1 Difference in genetic architecture is a key driver in  
2 plant-to-plant interaction: case study of height and  
3 rust damages in *Populus nigra*

4

5

6 Authors: Mathieu Tiret<sup>1,3\*</sup>, Leopoldo Sánchez<sup>2</sup>, Martin Lascoux<sup>1</sup>.

7

8 Affiliations:

9 - 1: Program in Plant Ecology and Evolution, Department of Ecology and Genetics,

10 EBC and SciLife Lab, Uppsala University, Uppsala, Sweden

11 - 2: BioForA, INRAE, ONF, Orléans, France.

12 - 3: IGEPP, INRAE, Institut Agro, Université de Rennes, Domaine de la Motte, Le

13 Rheu, France.

14 \* corresponding author: [mathieu.tiret@inrae.fr](mailto:mathieu.tiret@inrae.fr)

15

16 Abstract: (179 words)

17 Main text: 5,100 words.

18

19 keywords: group selection, genomic selection, *Populus nigra*, quantitative genetics.

20

21

22 **Abstract:**

23

24 Adaptation to competition during the evolutionary history of plants leads to a reduction of the  
25 overall group performance of plant elite material in the field. Traits related to competitive  
26 ability can be affected by the presence or absence of kin in the neighborhood. Consequently,  
27 local relatedness might reveal plant-to-plant interaction that can enhance the predictive  
28 abilities of genomic models when accounted for. However, recurrent family selection  
29 increases relatedness among all elite material and can blur the effect of relatedness on  
30 neighbors' phenotypes. To overcome this difficulty, we analyzed data from the French  
31 breeding program of *Populus nigra* L., where 1,452 genotypes were replicated six to eight  
32 times, each time encountering a different neighborhood. We assessed local relatedness and  
33 investigated genomic estimated breeding values on tree height and rust vulnerability with a  
34 single-step GBLUP incorporating local relatedness as a covariate. Results suggests that  
35 including local relatedness as an additional factor to GBLUP models is significantly more  
36 important for rust resistance than for tree height, mainly due to their contrasting genetic  
37 architecture – oligogenic for the former and polygenic for the latter.

38

## 39 Introduction

40 Breeding generally consists in redirecting evolutionary trade-offs towards new equilibria that  
41 often decrease fitness in favor of other economically interesting traits, or towards paths that  
42 were insufficiently explored by evolution in natural populations, such as group selection  
43 (Weiner, 2019). Although the importance of group selection in nature is controversial  
44 (Maynard Smith, 1964; Lewontin, 1970; Wilson & Wilson, 2007; Okasha, 2020), in a  
45 breeding program, group selection can be used to improve overall performance (e.g., robust  
46 productivity, tolerance to biotic or abiotic stress, or long-term response to selection), by  
47 keeping only those candidates that contribute favourably to plant-to-plant interactions. The  
48 performance of an individual can then be decomposed into direct and indirect breeding  
49 values (also called direct and indirect genetic effects), where the former is the intrinsic value  
50 of an individual without any competitors, and the latter the ability of the individual to increase  
51 or decrease performance due to competition (Griffing, 1967; Bijma & Wade, 2008). Breeding  
52 can benefit from accounting for both, especially in contexts in which the indirect genetic  
53 effect is strong, such as when intraspecific competition is strong among candidates (Weiner  
54 et al., 2017). Indeed, selfish strategies (in the sense of selfish genes), although increasing  
55 individual fitness, are often costly for the populations in breeding schemes - and breeding  
56 circumventing such strategies ended up with very successful results (e.g., Donald, 1981;  
57 Donald and Hamblin, 1983; Weiner et al., 2010). Competitive behavior can, therefore, be a  
58 burden that breeders might want to select against. Despite the early success of some  
59 ideotypes optimizing group performance, current breeding programs do not necessarily  
60 focus on integrating this dimension (e.g., Denison et al., 2003; Murphy et al., 2017;  
61 Montazeaud et al., 2020). Consequently, the pool of elite genotypes used nowadays might  
62 be mostly composed of selfish genotypes, since early mass selection, bypassing group  
63 dynamic, favored selfish genotypes for their vigorous phenotypes (Murphy et al., 2017). It is

64 therefore increasingly important in order to reach sustained genetic gain in breeding  
65 programs to counteract the effect of natural selection acting at the deployment phase, and to  
66 correct past artificial selection trajectories focussed on competitive (i.e., selfish) individuals .

67

68 In the specific case of plant breeding, resource competition between candidates occurs with  
69 the nearest plants (Casper et al., 1997; Milbau et al., 2007; File et al., 2011). The intensity of  
70 competition among neighbors may depend on their relatedness, or local relatedness, either  
71 because of kin selection, which predicts that relatives may cooperate (Hamilton, 1964), or  
72 niche partitioning, which predicts, on the contrary, that similar individuals may compete for  
73 similar resources (Silvertown, 2004). Therefore, plant-to-plant interaction can partly be due  
74 to local relatedness in one way or the other (Cahill et al., 2011), so that classic models can  
75 be improved by incorporating the information of neighboring genotypes. Although kin  
76 recognition was reported to be not particularly relevant in crop species because of their  
77 already high relatedness (e.g., Murphy et al., 2017), we might be able to detect it  
78 nonetheless in breeding schemes that have been less intensive, such as forest tree  
79 breeding. Group selection is in fact expected to give better genetic progress for perennial  
80 species, since (i) inbreeding coefficient is much lower than in crop species (even though  
81 inbreeding depression can be higher; Lesaffre & Billiard, 2021), and (ii) positive or negative  
82 interactions between neighbors last a lifetime.

83

84 Part of the phenotypic variance is due to the micro-environmental heterogeneity, and  
85 accounting for it has been shown to improve predictions (Cappa et al., 2022). Among the  
86 micro scale heterogeneity, local relatedness by variable neighborhood can create  
87 heterogeneity, hence a phenotypic variance that, when not accounted for, can bias genetic  
88 estimates. To account for heterogeneity caused by local relatedness, we chose to conduct  
89 our analyses on *Populus nigra* L.. Black poplar is a Eurasian riparian forest tree that  
90 contributes, as a parent along with *Populus deltoides* Bartr. ex Marsh., to one of the most  
91 widely used hybrid tree in forest breeding (*Populus x canadensis*), and is widely deployed as

92 clones, constituting a model in which kin recognition, if any, should be the strongest. The  
93 dataset, stemming from the French breeding program with 1,452 genotypes replicated six to  
94 eight times, created different neighborhoods for each replicated genotype (Pégard et al.,  
95 2020), all resulting from controlled crosses of 34 parents from natural populations, some of  
96 which were already used in the breeding programme for their performance. To detect any  
97 signal of group selection, we focused on two quantitative traits relevant for breeding, tree  
98 height and rust vulnerability. Growth of Black poplar is particularly susceptible to foliar rust,  
99 caused by a fungus (*Melampsora larici-populina* Kleb.) that leads to a reduction in  
100 photosynthesis efficiency, and might lead to the death of susceptible clones (Legionnet et  
101 al., 1999). Rust development is strongly influenced by susceptibility of nearby trees, hence  
102 putatively linked to local relatedness, whereas tree height is a poor indicator of competition  
103 and is mostly related to the fertility of the trial. Height is known to have a polygenic  
104 architecture (Du et al., 2016), and rust resistance to have a mono- or oligogenic architecture  
105 (e.g., Jorge et al., 2005), implying that relatedness – as the amount of shared alleles – will  
106 have different consequences on those two traits: genetic redundancy of height probably  
107 making it less sensitive to local relatedness than rust resistance.

108

109 In order to assess the contribution of local relatedness in the context of genomic selection  
110 (Meuwissen et al., 2001), we performed genomic evaluations with a multitrait single-step  
111 Genomic Best Linear Unbiased Predictor (ssGBLUP; Legarra et al., 2009; Christensen et al.,  
112 2010). Estimating breeding values with ssGBLUP is a solid baseline in forest trees as  
113 recently shown (e.g., Cappa et al., 2019; Ratcliffe et al., 2017), especially its multitrait  
114 version that is known to give higher accuracy (Calus et al., 2011). By including local  
115 relatedness and spatial micro-environmental autocorrelation as random effects in ssGBLUP  
116 models, we assessed whether plant-to-plant interactions – phenotypic covariance between  
117 neighbors – could be due to local relatedness. We assessed local relatedness with different  
118 subsets of SNPs, each maximizing or minimizing one of the following features: Minor Allele  
119 Frequency, Ancestry Informativeness Coefficient, significance in a Genome Wide

120 Association Study, or heritability. We show that local relatedness significantly impacts the  
121 phenotype of an individual and, when surrounded by related individuals, rust damage is  
122 significantly more important, whereas no interaction was visible on tree height. Differences in  
123 genetic architecture seem to play a role in plant-to-plant interactions.

124

## 125 Material and Methods

126 **Plant material.** The study is based on previously published data (Pégard et al., 2019, 2020).  
127 Seventeen male and 17 female *Populus nigra* were sampled in France, from 21 natural  
128 populations with no a priori selection and 13 from the French poplar breeding program for  
129 their performance on a range of traits, including growth and rust resistance. These  
130 individuals were used as parents in a factorial crossing plan and double-pair mating scheme.  
131 Clones of both parents and progeny, and a hundred additional individuals from breeding  
132 programs, were grown in four sequential experimental trials (parallel strips of two lines of  
133 trees, with an inter-strip spacing of 1m and an inter-strip spacing of 2 metres) at the same  
134 location (Guéméné-Penfao, France, 47°37'59"N, 1°49'59"W), each with a randomized  
135 incomplete 26 block design of single tree-plots (0.9 m x 1.0 m). In total, the experiment  
136 comprised 10,301 trees (including 7,169 trees with genotype information), 42 full-sib  
137 families, 5 half-sib families, 1,452 genotypes (each replicated on average 7.09 times), and  
138 an Unknown Parent Group (UPG) of 105 genotypes (Table S1). Family size ranged from 1 to  
139 119, with an average of 30.2 genotypes per family. Twenty genotypes and 17 families were  
140 shared across the four trials.

141

142 **Phenotype measurements.** We focused on two phenotypic traits on one-year-old trees:  
143 height and rust vulnerability (both measured on field). Height was assessed with a  
144 graduation rod (in cm), and rust vulnerability (natural infection) was assessed on a scale of 1  
145 to 9 : 1 when no rust was observed on the tree and 9 when more than 75% of lamina was  
146 covered by rust on more than 25% of the leaves (Legionnet et al., 1999). The homogeneity  
147 of rust pressure across the trial was assured by the level of infection measured on control  
148 individuals, being equally infected across blocks (clone ID: BDG). Some missing values were  
149 present across the trials (dead trees or unexploitable data), but at least 95.29%, 96.05%,

150 and 95.13% of the trees were phenotyped for height, rust vulnerability, or both traits,  
151 respectively. Given the low missing rate, we assumed that missing values only marginally  
152 unbalanced the block design, and so we used default parameters of the software packages  
153 for handling missing values when analyzing the data.

154

155 In each trial, every phenotype was first corrected for micro-environmental heterogeneity with  
156 a multitrait mixed model as follows:

157

$$158 Y_{ijkl} = \mu + \text{BLOCK}_i + \text{SPLINE} + e_{ijkl}$$

159

160 where 'Y<sub>ijkl</sub>' is the l-th phenotype of the k-th replicate of the j-th genotype in the i-th trial,  $\mu$  is  
161 the grand mean, 'BLOCK<sub>i</sub>' the random effect of the i-th block, 'SPLINE<sub>i</sub>' B-spline spatial  
162 autocorrelation correction over the surface of rows and columns (Cappa & Cantet, 2007),  
163 and 'e<sub>ijkl</sub>' the residuals. Both the block effect and the residuals follow a Gaussian distribution  
164 with diagonal covariance matrices, and the model was fitted separately by trial. We used the  
165 function *remlf90* (R package *breedR*; Munoz and Sanchez, 2014) with the parameters  
166 'model' set to 'splines' and 'method' set to 'em'. All further analyses were performed on the  
167 residuals of this model, i.e., on spatially adjusted phenotypes.

168

169 **Genomic data.** Out of the 1,452 genotypes, 1,034 were genotyped (25 parents and 1,009  
170 offspring), using a *Populus nigra* 12K custom Infinium Bead-Chip (Illumina, San Diego, CA)  
171 (Faivre-Rampant et al., 2016). Details of the DNA extraction protocol, bioinformatic pipelines,  
172 and SNP mapping on the 19 chromosomes are given in Faivre-Rampant et al. (2016) and  
173 Pégard et al. (2019, 2020). It is worth noting that the SNP chip array included SNP in QTLs  
174 and expression candidate genes associated with, among other traits, rust resistance, but not  
175 with vertical growth. We retained SNPs with a Minor Allele Frequency (MAF) > 5%; in total,  
176 7,129 SNPs were retained for further analyses (out of 7,513 initial SNPs).

177



178 **Genomic relationship matrix.** In order to build the relationship matrix necessary for  
179 inferring breeding values, we combined pedigree and genomic information (Legarra et al.,  
180 2009; Christensen et al., 2010). The pedigree relationship matrix  $A^\Gamma$  (following the notation of  
181 Legarra et al., 2009) was built using the tabular rule method (Emik and Terrill, 1949),  
182 modified to account for a single metafounder (assuming a single base population for the  
183 Unkown Parent Group or UPG; Legarra et al., 2015), with a self-relationship of  $\gamma = 8\sigma_p^2$ , with  
184  $\sigma_p^2$  the variance of allele frequencies across markers (Garcia-Baccino et al., 2017). The  
185 combined relationship matrix H was summarized in Aguilar et al. (2019), and is:

186

$$187 \quad H^{-1} = (A^\Gamma)^{-1} + (0,0;0; G^{-1} - (A_{22}^\Gamma)^{-1}) \quad (1),$$

188

189 where  $A_{22}^\Gamma$  is the submatrix of  $A^\Gamma$  corresponding to the genotyped individuals,  $G = (1-\alpha)(\omega_a +$   
190  $\omega_b \times G_v) + \alpha A_{22}^\Gamma$ , with  $G_v$  the genomic relationship matrix estimated from the SNPs and  
191 scaled following the first scaling method of Van Raden (2008),  $\alpha$  a scaling parameter (here  
192 equal to 0.05), and  $\omega_a$  and  $\omega_b$  chosen to equate the average inbreeding and the average  
193 relationships in  $G_v$  and  $A_{22}^\Gamma$  as in Christensen et al. (2012). As the sample size was relatively  
194 small, the matrix  $H^{-1}$  was obtained by simply inverting H with the function *solve* (R package  
195 *base*).

196

197 **Population structure.** In order to control for population structure and avoid spurious  
198 associations, we computed a distance matrix  $1 - H^*$ , where  $H^*$  is the correlation matrix  
199 obtained from H using the function *cov2cor* (R package *stats*), and the minus sign is to  
200 convert similarities to distances. We then used Multidimensional Scaling (MDS) on the  
201 distance matrix with the function *cmdscale\_lanczos* (R package *refund*; Goldsmith et al.,  
202 2022; Miller, 2022) with the parameter 'k' set to 5 (hence explaining > 90% of the variance),  
203 and 'eig' set to 'TRUE'. Negative eigenvalues were set to null, and the variance explained by  
204 an axis was computed as the ratio between its squared eigenvalue and the sum of the  
205 squared eigenvalues. Additionally, to assess how well the family structure was captured, we

206 measured the variable  $V_F$  defined as the average within family variance on the first five axes  
207 (the lower the  $V_F$ , the better the family structure is captured). To make MDSs comparable,  
208 we normalized  $V_F$  by the sum of squares of the first five eigenvalues.

209

210 **Breeding value inferences.** The spatially adjusted phenotypes were then used to infer the  
211 breeding values with a multitrait single-step Genomic Best Linear Unbiased Predictor  
212 (ssGBLUP), as follows:

213

$$214 \quad Y_{ijkl} = \mu + \text{mds1}_j + \text{mds2}_j + \text{TRIAL}_i + \text{ANIMAL}_j + e_{ijkl} \quad , \quad (2)$$

215

216 where ' $Y_{ijkl}$ ' is the  $l$ -th phenotype of the  $k$ -th replicate of the  $j$ -th genotype in the  $i$ -th trial,  $\mu$  is  
217 the grand mean, ' $\text{mds1}_j$ ' and ' $\text{mds2}_j$ ' the fixed effects on the  $j$ -th genotype of the first and  
218 second axes of the MDS, respectively, ' $\text{TRIAL}_i$ ' the random effect of the  $i$ -th trial, ' $\text{ANIMAL}_j$ '  
219 the polygenic effect of the  $j$ -th genotype, and ' $e_{ijkl}$ ' the residuals. Both the trial effect and the  
220 residuals follow a Gaussian distribution with diagonal covariance matrices, and the polygenic  
221 effect follows a Gaussian distribution with a covariance matrix equal to  $k.H \times \Sigma$ , where  $k$  is a  
222 scaling parameter equal to  $1 - \gamma/2$  (Legarra et al., 2015),  $H$  the combined relationship matrix,  
223  $\times$  the Kronecker product, and  $\Sigma$  the  $2 \times 2$  covariance matrix between height and rust  
224 vulnerability. Estimates of coefficients and variance components of model (2) were obtained  
225 with the function *remIf90* (R package *breedR*) through one run with the 'method' parameter  
226 set to 'em' until convergence, then another run with the parameter 'method' set to 'ai' and the  
227 parameter 'progsf90.option' set to 'maxrounds 1'. The output estimate of ' $\text{ANIMAL}_j$ ' is the  
228 Estimated Breeding Value (EBV) of the  $j$ -th genotype. The additive variance was obtained  
229 from the diagonal elements of  $\Sigma$ , and used to estimate heritability (the denominator of which  
230 also comprises the residual variance). The predictive ability (PA) of the model was defined  
231 as Pearson's correlation coefficient between the breeding values re-estimated from the  
232 effect sizes (see below) and the adjusted phenotypes corrected by the trial effect (i.e.,  $Y_{ijkl} -$   
233  $\text{TRIAL}_i$ ).

234

235 **Genome-Wide Association Study (GWAS).** Following the equations of Aguilar et al.  
236 (2019), the effect size of the SNPs was back-solved from the EBVs, along with their  
237 standard error and their p-values. This process was performed trait by trait (i.e., without  
238 accounting for the multitrait dimension) without loss of information, and taking all effects as  
239 fixed, as the Pearson's correlation between the ssGBLUP's EBV and the breeding values re-  
240 estimated by the effect sizes was greater than 0.999.

241

242 With the estimated effect sizes and the standard errors, we also computed an alternative to  
243 the p-value accounting for multiple testing: the local false sign rate (lfsr) estimated with an  
244 empirical Bayes approach for adaptive shrinkage using the function *ash* (R package *ashr*;  
245 Stephens, 2017). In order to detect GWAS peaks (regions in the chromosomes with a high  
246 density of significant SNPs), we used a custom peak detection script on the profile of lfsr  
247 (Tiret & Milesi, 2021) with default parameters. The script filtered out significant hits that are  
248 not statistically detected as a peak which is defined here as an abnormally high  
249 concentration of significant SNPs in a small chromosomal area.

250

251 **Neighborhood.** In order to account for the effect of the neighborhood, we estimated the  
252 breeding values with an additional fixed effect, the local relatedness, defined as the average  
253 relationship (from the matrix H) between a focal individual and its neighbors (eight or less if  
254 on boundaries; as the king's moves on a chessboard). Local relatedness was orthogonal to  
255 any micro-environmental effect, because of the random block design. The re-estimated  
256 breeding values were denoted nEBV.

257

258 **SNP subsets.** We investigated the effect of sampling SNPs on the ssGBLUP (i.e., weighted  
259 ssGBLUP). We selected subsets based on population and quantitative genetics features  
260 computed after a first run of ssGBLUP: MAF, Ancestry Informativeness Coefficient (AIM;  
261 Rozenberg et al., 2003), and for each trait, significance in the GWAS, and additive variance.

262 For each feature, we kept one-tenth of the whole set (713 SNPs, a sample size close to  
263 previous studies on weighted GBLUP, e.g., Li et al., 2018) with either the smallest or the  
264 largest values, ending up with 12 subsets. AIM was estimated per family with the R script  
265 provided by Cappa et al. (2022). Additive variance explained by a SNP was estimated as  
266  $2p(1-p)a^2$ , where  $p$  is the MAF, and  $a$  the effect size (assuming no dominance nor interaction  
267 deviation of the genetic variance; p.129, Falconer, 1989). We re-estimated the combined  
268 relationship matrix for each SNP subset by re-estimating in the equation (1) the genomic  
269 relationship matrix  $G_v$  with the SNP subset. With the re-estimated matrices  $H$ , we re-  
270 performed the MDSs, and re-estimated the PAs of the EBVs and nEBVs (where local  
271 relatedness were measured with the re-estimated  $H$ ).

272

273 **Statistical tests.** For each SNP subset, we computed the confidence interval of the  
274 Predictive Ability (PA) with a 1000 iteration bootstrap (re-sampling individuals), without re-  
275 estimating the covariance matrix  $\Sigma$ . Here, the bootstrap was only used to assess the  
276 variance, so that we centered the bootstrapped PA around the true PA. To assess the effect  
277 of sampling, these subsets were compared to 1000 random samples of 713 SNPs (the size  
278 of the SNP subsets). Comparisons were performed with a Student's one-sample  $t$ -test  
279 (denoted  $t_1$  with a degree of freedom or df of 999 corresponding to the number of bootstrap  
280 iterations), or a Welch two-sample  $t$ -test (denoted  $t_2$  with a varying df), both using the  
281 function *t.test* (R package *stats*). The sign of the  $t$  statistic is arbitrarily reported as positive  
282 when greater than a baseline (e.g., the true PA), and negative when not. Models were  
283 compared with a likelihood ratio test with a df of 1 using the function *lrtest* (R package *lmtest*;  
284 Zeileis & Hothorn, 2002). All scripts were written in R v4.1.3 (R Core Team, 2022).

285

286

## 287 Results

288 Tree height and rust vulnerability both exhibited high heritabilities (0.469 and 0.666,  
289 respectively), high predictive abilities (0.677 and 0.755 respectively), and a strong  
290 independence, with an estimated genetic correlation of 0.022. The GWAS did not overfit  
291 phenotypic variation: swapping phenotypes (permutation test) among family members of the  
292 same block (i.e., only randomly mismatching Mendelian sampling) significantly reduced the  
293 average significance of the SNPs ( $t_1 < -2.59 \times 10^2$ ,  $p < 0.001$ ). Only one genetic variant was  
294 significantly associated with rust vulnerability, located on chromosome 1, and none for tree  
295 height (Fig. 1A, 1B). The Q-Q plot on rust vulnerability revealed that some SNPs were  
296 significantly associated with a level of significance well above the 95% confidence interval  
297 (Fig. 1D); most of them being in the identified peak. None of the SNPs were significantly  
298 associated with tree height after Bayesian shrinkage, and Q-Q plot revealed a classic  
299 population structure overcorrection (Fig. 1C).

## 300 Common and most heritable alleles structured families

301 The population under study is structured in a hierarchical way: first into populations, then into  
302 families. Population structure, captured by the first eigenvalues (Patterson et al., 2006),  
303 substantially shaped genetic diversity, as the first two eigenvalues alone explained more  
304 than 50% of the variance (40.0% and 24.5% respectively; Fig. S1). Because the population  
305 underwent family selection during breeding in the past, family structure is strong and can  
306 even be apprehended visually (Fig. 2). Several statistics significantly supports the strong  
307 family structure: (i) randomly shuffling the family ID increased by 9.96 times the within  
308 “family” variance ( $t_1 = 3.70 \times 10^3$ ,  $p < 0.001$ ); (ii) when restricting to common alleles, the first  
309 two eigenvalues of the PCA still explained a large part of the variance (56.2%), showing that  
310 family structure is bound to selection, as expected under family selection.

311

312 Structure is generally assumed to be reflected by polymorphism at neutral genes scattered  
313 across the genome, to the point where samples of SNPs can reveal population structure  
314 quite accurately if they are sufficiently large. In order to understand what drove the family  
315 structure, similarly to using annotation to focus on some SNPs, we subset 10% of the SNPs  
316 first randomly and then according to their MAF, AIM, significance in a GWAS, or additive  
317 variance, thus redefining relatedness with a different set of linkage disequilibrium. In our  
318 dataset, random samples of SNPs, performed quite poorly compared to the whole set of  
319 SNPs ( $t_1 = 2.12 \times 10^2$ ,  $p < 0.001$ ), although the SNPs were scattered along the genome.  
320 However, SNPs had a different structuring power at the family level according to the way  
321 they were sampled (Fig. 3): SNPs with the largest AIM, performing better than random  
322 samples ( $t_1 = 3.86 \times 10^2$ ,  $p < 0.001$ ), and even than the whole set; and SNPs with the largest  
323 MAF and the largest additive variance, performing better than random samples ( $t_1 > 1.09 \times$   
324  $10^2$ ,  $p < 0.001$ ). This result suggests that family structure information is carried by patches  
325 over the genome instead of being scattered across the genome.

### 326 Local relatedness improves ssGBLUP fit for rust vulnerability

327 Although the growth of focal individuals was not affected by their neighbors, damage due to  
328 rust was more severe the more related the focal individuals were with their neighbors.  
329 Indeed, the genomic models incorporating local relatedness as a covariate had significantly  
330 higher likelihood than without for rust vulnerability ( $\chi^2 = 9.83$ ,  $p = 0.002$ ), but not for tree  
331 height ( $\chi^2 = 0.09$ ,  $p = 0.236$ ). As for family structure which is driven by some SNPs, different  
332 categories of SNPs had a different impact on focal phenotypes. When accounting for  
333 relatedness via the different subsets of SNPs, the Akaike Information Criterion (AIC)  
334 generally decreased (Fig. S2). However, for rust vulnerability, only the subset of SNPs with  
335 the largest MAF significantly increased the likelihood of the model ( $\chi^2 = 4.02$ ,  $p = 0.04$ ), that  
336 is the one that best captured the family structure. Likelihood was not significantly improved  
337 by SNPs with the largest AIM ( $\chi^2 = 0.15$ ,  $p = 0.703$ ) or the largest additive variance ( $\chi^2 =$   
338  $2.65$ ,  $p = 0.104$ , respectively), and was significantly worse with other subsets ( $\chi^2 > 6.66$ ,  $p <$

339 0.010). For tree height, no subset of SNPs improved the likelihood ( $\chi^2 < 3.48$ ,  $p > 0.062$ ). In  
340 other words, when focal individuals had related individuals in their vicinity, the focal  
341 phenotypes were more affected: in this case, the vicinity of related individuals caused  
342 significantly more rust damage.

343

344 The results suggest that shared vulnerability is the cause of rust damage amplification in the  
345 related neighborhood. In support of this claim, the covariance between random pairs of  
346 neighboring individuals' rust vulnerability was enriched by local relatedness: from an average  
347 of 0.28 for the whole set to 0.43 when only the most related neighbors (highest quartile)  
348 were retained, suggesting that local relatedness was a proxy for phenotypic similarity for the  
349 trait rather than the cause of plant-to-plant interactions (through kin selection or niche  
350 partitioning).

351

352 In spite of genomic models being sensitive to local relatedness, improvement of predictive  
353 abilities (PA) was limited (Fig. S3) - probably due to a lack of power. Indeed, incorporating  
354 local relatedness did not significantly change the PA neither with the whole set of SNPs ( $|t_2|$   
355  $< 0.594$ ,  $p > 0.553$ ), nor with any of the alternative subsets ( $|t_2| < 1.03$ ,  $p > 0.301$ ), with a  
356 slightly better PA when incorporating local relatedness for SNPs with the smallest MAF on  
357 rust vulnerability ( $t_2 = 1.73$ ,  $df = 2.00 \times 10^3$ ,  $p = 0.0841$ ), and SNPs with the smallest tree  
358 height significance on rust vulnerability ( $t_2 = 1.97$ ,  $df = 2.00 \times 10^3$ ,  $p = 0.0491$ ). See the  
359 Supplementary materials for further details.

360

361

362

363

364

365

366

367

368

369

370



## 371 Discussion

372 Genomic selection in forest tree breeding has successfully predicted growth and wood  
373 quality for many species (Lenz et al., 2020), such as Eucalyptus (e.g. Resende et al., 2012),  
374 pines (e.g., Isik et al., 2016), or spruces (e.g., Beaulieu et al., 2014). The predictive ability  
375 (PA) of the underlying genomic models relies on the ability of genotypic data to capture the  
376 covariance between candidate loci, thereby reflecting how much genetic similarity explains  
377 phenotypic similarities (Powell et al., 2010). An additional source of phenotypic covariances  
378 are micro-environmental effects, and accounting for spatial autocorrelation can enhance  
379 genomic predictions (Cappa et al, 2022). In our case, on top of spatial autocorrelation, we  
380 accounted for local relatedness, another source of heterogeneity. Results show that part of  
381 the plant-to-plant interaction can be ascribed to the relatedness with neighbors. In the case  
382 of the Black poplars under study, for rust vulnerability the interaction was more likely due to  
383 relatedness being a proxy rather than revealing kin selection/niche partitioning. Additionally,  
384 relatedness increases rust damages, whether focal individuals and neighbors are resistant  
385 or not, suggesting that inoculum pressure partly increases with relatedness. The lack of  
386 diversity at the local scale can hence be detrimental, whatever the level of resistance of  
387 individuals.

## 388 Differences in genetic architecture driving local relatedness

389 It is generally assumed that tree height is a complex trait with a highly polygenic architecture,  
390 which might not be the case for rust vulnerability (Du et al. 2016; Jorge et al., 2005). The  
391 composition of our SNP array may also have had an influence on the way both architectures  
392 were '*captured*', as the chip was enriched during its development in QTLs and candidate  
393 expression genes related to rust resistance (Faivre-Rampant et al., 2016), but not for height,  
394 the most polygenic of the two traits. The low genetic correlation between both traits is  
395 consistent with some previous reports (e.g., Beaulieu et al., 2020; Liu et al., 2022), though

396 not all (e.g., Lenz et al., 2021; Cappa et al., 2022); we will assume in our case that  
397 orthogonality is strong enough to show that the traits are non-redundant, with independent  
398 architectures.

399

400 The differences in genetic architecture between the two traits studied, as well as the design  
401 of the SNP array, may have determined the results in terms of association, with only one  
402 major gene detected (as a peak) for rust, in contrast to the absence of associations for the  
403 more polygenic trait. Another element that may have influenced the association for rust is its  
404 phenotypic scoring, which is based on a qualitative scale of nine notations. Even if it should  
405 be taken cautiously, it is not uncommon to encounter a simpler genetic architecture for  
406 response to biotic constraints compared to complex quantitative traits (e.g., gene-for-gene  
407 resistance; Flor, 1971; Jorge et al., 2005). Consequently, many haplotype combinations can  
408 lead to tall individuals, but few to rust resistance, because a polygenic architecture is  
409 redundant; in other words, when individuals are related, their probability of both being  
410 resistant is higher than that of both being tall. Local relatedness thus reveals a shared  
411 vulnerability within the neighborhood.

412

### 413 Selection of relatedness or co-selection of relatives?

414 Interactions between neighbors may depend on local relatedness, and whether this  
415 interaction is positive or negative depends on the relative strength of kin selection (Hamilton,  
416 1964) and niche partitioning (Silvertown, 2004). As mentioned above, the importance of  
417 group selection in nature is still debated, but local relatedness has been shown to be  
418 perceived through kin recognition in plant species (e.g., Dudley et al., 2007; Murphy et al.,  
419 2009). Such recognition could then lead to favorable (kin selection) or unfavorable (niche  
420 partitioning) interactions. One such detrimental interaction is competition. Competition can  
421 be accounted for in a quantitative genetic model by assigning to an individual one direct  
422 genetic effect (DGE) as the effect of its genes on its own phenotype, and one indirect

423 genetic effect (IGE) as the effect of its genes on phenotypes of surrounding individuals  
424 (Griffing, 1967; potential applications in Muir, 2005). Competition occurs when DGE and IGE  
425 are negatively correlated. A positive correlation from such a model would suggest a  
426 cooperative synergistic interaction. Although adding complexity to the model, including  
427 competition has been shown to reduce bias in covariance estimation (Costa e Silva et al.,  
428 2013). In our case, in addition to attempts to include interactions, IGE resulted in a lower  
429 predictive ability than with the ssGBLUP baseline (results not shown).

430

431 The simpler genetic architecture of rust vulnerability compared to that of tree height might  
432 play a role in shaping the phenotypes. Family structure was driving similarity of rust  
433 vulnerability, and combination of similar vulnerability resulted in increased rust damage. The  
434 amplifying effect is even stronger in perennials as shared vulnerability can be perceived by  
435 successive generations of pathogens. Consistent with the increased disease resilience  
436 conferred by varietal association in a field (e.g., Smithson and Lenne, 1996; Burdon and  
437 Thrall, 2009), the local aggregation of susceptible individuals amplified rust damage.  
438 Resistance similarity and relatedness were strongly linked, but it is likely that the more  
439 complex the genetic architecture, the easier it is to dissociate phenotypic similarity and  
440 relatedness.

441

442 Once it has been shown that neighbourhood relatedness is indeed correlated with similarity  
443 at focal phenotypes, the difficulty in disentangling kin selection from niche partitioning is to  
444 determine whether the relatedness is a cause, as an expression of kin selection or niche  
445 competition, or a consequence, as an expression of a confounding between relatedness and  
446 phenotypic interaction. In the latter case, the focal phenotype would be modified by that of its  
447 neighbors through plant-to-plant interactions, and if phenotypic interaction increases when  
448 phenotypes are similar (i.e., directional selection, e.g., competition for resource uptake), it  
449 can be confused with the effect of relatedness, as genetically related individuals tend to have  
450 similar phenotypes.

451

452 Whether there was kin selection/competition in addition to the phenotypic interaction, or  
453 whether we simply lacked statistical power, is difficult to assess. Selection on local  
454 relatedness due to kin selection or niche partitioning - selection on relatedness - might be  
455 confused with the fact that selection leads to phenotypic convergence, that in turn leads to a  
456 genotypic convergence - a co-selection of related. The randomization in the block design  
457 and repetition can partly limit this confusion, but it is evident that interpreting the data is  
458 fraught with difficulties, as the tallest individuals showed also a higher relatedness with the  
459 rest of the population. The fact that family structure was mainly carried by SNPs likely  
460 associated with selection (following the hypothesis of Yang et al., 2010 and Biddanda et al.,  
461 2020) suggest that relatives were co-selected, as is often the case in breeding programs  
462 implementing family selection. An inevitable consequence is that, as seen in crop selection,  
463 interesting genotypes for kin selection/cooperation have been lost during domestication  
464 (Fréville et al., 2022), making it difficult for genomic selection to account for local relatedness  
465 (as predictive abilities show).

466

467

## 468 Acknowledgements

469 The authors acknowledge the Uppsala University and the European Union's Horizon 2020  
470 B4EST for basic functioning and postdoctoral grant for MT. The authors would like to thank  
471 Véronique Jorge and Remy Gobin of the BioForA unit (INRAE, ONF, Orléans, France) for  
472 their help in compiling the data. The computations and data handling were enabled by  
473 resources provided by the Swedish National Infrastructure for Computing (SNIC 2017-7-296)  
474 at UppMax partially funded by the Swedish Research Council through grant agreement no.  
475 2018-05973.

## 476 Author Contributions

477 MT was responsible for writing the report, conducting the search, extracting and analysing  
478 data, interpreting results, updating reference lists. LS was responsible for designing the  
479 experiments and screening potentially eligible studies. ML and LS contributed to interpreting  
480 results and provided feedback on the report.

## 481 Competing Interests

482 The authors declare that there is no conflict of interest.

## 483 Data Archiving

484 The data that support the findings of this study are openly available on DATA INRAE at  
485 <https://data.inrae.fr/privateurl.xhtml?token=b79ab1ca-ebb9-47c6-9272-1568c0c33d70>.

486

## 487 Rereferences

488

489 Aguilar, I., Legarra, A., Cardoso, F., Masuda, Y., Lourenco, D., & Misztal, I. (2019).

490 Frequentist p-values for large-scale-single step genome-wide association, with an

491 application to birth weight in American Angus cattle. *Genetics Selection Evolution*, 51(1), 1-

492 8.

493

494 Astle, W., & Balding, D. J. (2009). Population structure and cryptic relatedness in genetic

495 association studies. *Statistical Science*, 24(4), 451-471.

496

497 Beaulieu, J., Doerksen, T., Clément, S., MacKay, J., & Bousquet, J. (2014). Accuracy of

498 genomic selection models in a large population of open-pollinated families in white spruce.

499 *Heredity*, 113(4), 343-352.

500

501 Beaulieu, J., Nadeau, S., Ding, C., Celedon, J. M., Azaiez, A., Ritland, C., et al. (2020).

502 Genomic selection for resistance to spruce budworm in white spruce and relationships with

503 growth and wood quality traits. *Evolutionary applications*, 13(10), 2704-2722.

504

505 Biddanda, A., Rice, D. P., & Novembre, J. (2020). A variant-centric perspective on

506 geographic patterns of human allele frequency variation. *Elife*, 9, e60107.

507

508 Bijma, P., & Wade, M. J. (2008). The joint effects of kin, multilevel selection and indirect

509 genetic effects on response to genetic selection. *Journal of evolutionary biology*, 21(5),

510 1175-1188.

511

- 512 Burdon, J. J., & Thrall, P. H. (2009). Coevolution of plants and their pathogens in natural  
513 habitats. *Science*, 324(5928), 755-756.
- 514
- 515 Boyle, E. A., Li, Y. I., & Pritchard, J. K. (2017). An expanded view of complex traits: from  
516 polygenic to omnigenic. *Cell*, 169(7), 1177-1186.
- 517
- 518 Cahill Jr, J. F., & McNickle, G. G. (2011). The behavioral ecology of nutrient foraging by  
519 plants. *Annual Review of ecology, evolution, and systematics*, 42, 289-311.
- 520
- 521 Calus, M. P., & Veerkamp, R. F. (2011). Accuracy of multi-trait genomic selection using  
522 different methods. *Genetics Selection Evolution*, 43(1), 1-14.
- 523
- 524 Cappa, E. P., & Cantet, R. J. (2007). Bayesian estimation of a surface to account for a  
525 spatial trend using penalized splines in an individual-tree mixed model. *Canadian Journal of*  
526 *Forest Research*, 37(12), 2677-2688.
- 527
- 528 Cappa, E. P., de Lima, B. M., da Silva-Junior, O. B., Garcia, C. C., Mansfield, S. D., &  
529 Grattapaglia, D. (2019). Improving genomic prediction of growth and wood traits in  
530 Eucalyptus using phenotypes from non-genotyped trees by single-step GBLUP. *Plant*  
531 *Science*, 284, 9-15.
- 532
- 533 Cappa, E. P., Ratcliffe, B., Chen, C., Thomas, B. R., Liu, Y., Klutsch, J., et al. (2022).  
534 Improving lodgepole pine genomic evaluation using spatial correlation structure and SNP  
535 selection with single-step GBLUP. *Heredity*, 128(4), 209-224.
- 536
- 537 Casper, B. B., & Jackson, R. B. (1997). Plant competition underground. *Annual review of*  
538 *ecology and systematics*, 545-570.
- 539

540 Christensen, O. F., & Lund, M. S. 2010. Genomic prediction when some animals are  
541 not genotyped. *Genetics Selection Evolution* 42, 2.  
542

543 Christensen, O. F., Madsen, P., Nielsen, B., Ostersen, T., & Su, G. (2012). Single-step  
544 methods for genomic evaluation in pigs. *animal*, 6(10), 1565-1571.  
545

546 Costa e Silva, J., Kerr, R.J. (2013) Accounting for competition in genetic analysis, with  
547 particular emphasis on forest genetic trials. *Tree Genetics & Genomes*, 9, 1-17.  
548

549 Denison, R. F., Kiers, E. T., & West, S. A. (2003). Darwinian agriculture: when can humans  
550 find solutions beyond the reach of natural selection? *The quarterly review of biology*, 78(2),  
551 145-168.  
552

553 Diouf, I., Derivot, L., Koussevitzky, S., Carretero, Y., Bitton, F., Moreau, L., & Causse, M.  
554 (2020). Genetic basis of phenotypic plasticity and genotype× environment interactions in a  
555 multi-parental tomato population. *Journal of Experimental Botany*, 71(18), 5365-5376  
556

557 Donald, C.M. (1981). Competitive plants, communal plants, and yields in wheat crops.  
558 L. Evans, W.J. Peacock (Eds.), *Wheat Science – Today and Tomorrow*, Cambridge  
559 University Press.  
560

561 Donald, C.M., Hamblin, J. (1983). The convergent evolution of annual seed crops in  
562 agriculture. In *Advances in agronomy* (ed. NC Brady), pp. 97–143. New York, NY:  
563 Academic Press.  
564

565 Dong, L., Xiao, S., Chen, J., Wan, L., & Wang, Z. (2016). Genomic selection using extreme  
566 phenotypes and pre-selection of SNPs in large yellow croaker (*Larimichthys crocea*). *Marine*  
567 *Biotechnology*, 18(5), 575-583.



568

569 Du, Q., Gong, C., Wang, Q., Zhou, D., Yang, H., Pan, W., et al. (2016). Genetic architecture  
570 of growth traits in *Populus* revealed by integrated quantitative trait locus (QTL) analysis and  
571 association studies. *New Phytologist*, 209(3), 1067-1082.

572

573 Fisher, R.A. (1918). The correlation between relatives under the supposition of Mendelian  
574 inheritance. *Trans. Roy. Soc. Edinburgh* 52, 399-433.

575

576 Gualdrón Duarte, J. L., Gori, A. S., Hubin, X., Lourenco, D., Charlier, C., Misztal, I., & Druet,  
577 T. (2020). Performances of Adaptive MultiBLUP, Bayesian regressions, and weighted-  
578 GBLUP approaches for genomic predictions in Belgian Blue beef cattle. *BMC genomics*,  
579 21(1), 1-18.

580

581 Dudley, S. A., & File, A. L. (2007). Kin recognition in an annual plant. *Biology Letters*, 3(4),  
582 435-438.

583

584 Emik, L. O., & Terrill, C. E. (1949). Systematic procedures for calculating inbreeding  
585 coefficients. *Journal of Heredity*, 40(2), 51-55.

586

587 Faivre-Rampant, P., Zaina, G., Jorge, V., Giacomello, S., Segura, V., Scalabrin, S., et al.  
588 (2016). New resources for genetic studies in *Populus nigra*: Genome-wide SNP discovery  
589 and development of a 12k Infinium array. *Molecular ecology resources*, 16(4), 1023-1036.

590

591 Falconer, D.S. (1989). Introduction to quantitative genetics (3rd edition, p. 129). Pearson  
592 Education India.

593

594 Feau, N., Joly, D. L., & Hamelin, R. C. (2007). Poplar leaf rusts: model pathogens for a  
595 model tree. *Botany*, 85(12), 1127-1135.

596

597 File, A. L., Murphy, G. P., & Dudley, S. A. (2012). Fitness consequences of plants growing  
598 with siblings: reconciling kin selection, niche partitioning and competitive ability. *Proceedings*  
599 *of the Royal Society B: Biological Sciences*, 279(1727), 209-218.

600

601 Flor, H. H. (1971). Current status of the gene-for-gene concept. *Annual review of*  
602 *phytopathology*, 9(1), 275-296.

603

604 Fréville, H., Montazeaud, G., Forst, E., David, J., Papa, R., & Tenailon, M. I. (2022). Shift in  
605 beneficial interactions during crop evolution. *Evolutionary Applications*, 15(6), 905-918.

606

607 Garcia-Baccino, C. A., Legarra, A., Christensen, O. F., Misztal, I., Pocrnic, I., Vitezica, Z. G.,  
608 & Cantet, R. J. (2017). Metafounders are related to F<sub>st</sub> fixation indices and reduce bias in  
609 single-step genomic evaluations. *Genetics Selection Evolution*, 49(1), 1-14.

610

611 Goldsmith, J., Scheipl, F., Huang, L., Wrobel, J., Di, C., Gellar, J., et al. (2022). refund:  
612 Regression with Functional Data. R package version 0.1-26.

613 <https://CRAN.R-project.org/package=refund>

614

615 Griffing, B. (1967). Selection in reference to biological groups I. Individual and group  
616 selection applied to populations of unordered groups. *Australian Journal of Biological*  
617 *Sciences*, 20(1), 127-140.

618

619 Hamilton, W. D. (1964). The genetical evolution of social behaviour. II. *Journal of theoretical*  
620 *biology*, 7(1), 17-52.

621

622 Isik, F., Bartholomé, J., Farjat, A., Chancerel, E., Raffin, A., Sanchez, L., et al. (2016).  
623 Genomic selection in maritime pine. *Plant Science*, 242, 108-119.

624

625 Jorge, V., Dowkiw, A., Faivre-Rampant, P., & Bastien, C. (2005). Genetic architecture of  
626 qualitative and quantitative *Melampsora larici-populina* leaf rust resistance in hybrid poplar:  
627 genetic mapping and QTL detection. *New Phytologist*, 167(1), 113-127.

628

629 Kijas, J., Elliot, N., Kube, P., Evans, B., Botwright, N., King, H., et al. (2017). Diversity and  
630 linkage disequilibrium in farmed Tasmanian Atlantic salmon. *Animal genetics*, 48(2), 237-  
631 241.

632

633 Legarra, A., Aguilar, I., & Misztal, I. (2009). A relationship matrix including full pedigree and  
634 genomic information. *Journal of dairy science*, 92(9), 4656-4663.

635

636 Legarra, A., Christensen, O. F., Vitezica, Z. G., Aguilar, I., & Misztal, I. (2015). Ancestral  
637 relationships using metafounders: finite ancestral populations and across population  
638 relationships. *Genetics*, 200(2), 455-468.

639

640 Legionnet, A., Muranty, H., & Lefèvre, F. (1999). Genetic variation of the riparian pioneer  
641 tree species *Populus nigra*. II. Variation in susceptibility to the foliar rust *Melampsora larici-*  
642 *populina*. *Heredity*, 82(3), 318-327.

643

644 Lenz, P. R., Nadeau, S., Mottet, M. J., Perron, M., Isabel, N., Beaulieu, J., & Bousquet, J.  
645 (2020). Multi-trait genomic selection for weevil resistance, growth, and wood quality in  
646 Norway spruce. *Evolutionary applications*, 13(1), 76-94.

647

648 Lesaffre, T., & Billiard, S. (2021). On Deleterious Mutations in Perennials: Inbreeding  
649 Depression, Mutation Load, and Life-History Evolution. *The American Naturalist*, 197(5),  
650 E143-E155.

651

652 Lewontin, R. C. (1970). The units of selection. *Annual review of ecology and systematics*, 1-  
653 18.

654

655 Li, B., Zhang, N., Wang, Y. G., George, A. W., Reverter, A., & Li, Y. (2018). Genomic  
656 prediction of breeding values using a subset of SNPs identified by three machine learning  
657 methods. *Frontiers in genetics*, 9, 237.

658

659 Liu, Y., Erbilgin, N., Ratcliffe, B., Klutsch, J. G., Wei, X., Ullah, A., et al. (2022). Pest  
660 defences under weak selection exert a limited influence on the evolution of height growth  
661 and drought avoidance in marginal pine populations. *Proceedings of the Royal Society B*,  
662 289(1982), 20221034.

663

664 Lu, S., Liu, Y., Yu, X., Li, Y., Yang, Y., Wei, M., et al. (2020). Prediction of genomic breeding  
665 values based on pre-selected SNPs using ssGBLUP, WssGBLUP and BayesB for  
666 Edwardsiellosis resistance in Japanese flounder. *Genetics Selection Evolution*, 52(1), 1-10.

667

668 Luo, Z., Yu, Y., Xiang, J., & Li, F. (2021). Genomic selection using a subset of SNPs  
669 identified by genome-wide association analysis for disease resistance traits in aquaculture  
670 species. *Aquaculture*, 539, 736620.

671

672 Maynard Smith, J. (1964). Group selection and kin selection. *Nature*, 201(4924), 1145-1147.

673

674 Meuwissen, T. H. E. (1997). Maximizing the response of selection with a predefined rate of  
675 inbreeding. *Journal of animal science*, 75(4), 934-940.

676

677 Meuwissen, T. H., Hayes, B. J., & Goddard, M. (2001). Prediction of total genetic value using  
678 genome-wide dense marker maps. *genetics*, 157(4), 1819-1829.

679

680 Milbau, A., Reheul, D., De Cauwer, B., & Nijs, I. (2007). Factors determining plant–  
681 neighbour interactions on different spatial scales in young species-rich grassland  
682 communities. *Ecological research*, 22(2), 242-247.  
683  
684 Miller, D. L. (2022). porridge: Principal Co-Ordinate Ridge Regression. R package version  
685 1.2.  
686  
687 Montazeaud, G., Rousset, F., Fort, F., Violle, C., Fréville, H., & Gandon, S. (2020). Farming  
688 plant cooperation in crops. *Proceedings of the Royal Society B*, 287(1919), 20191290.  
689  
690 Muir, W. M. (2005). Incorporation of competitive effects in forest tree or animal breeding  
691 programs. *Genetics*, 170(3), 1247-1259.  
692  
693 Muñoz, F., and Sanchez, L. (2020). breedR: Statistical Methods for Forest Genetic  
694 Resources Analysts. R package version 0.12-5. <https://github.com/famuvie/breedR>  
695  
696 Murphy, G. P., & Dudley, S. A. (2009). Kin recognition: competition and cooperation in  
697 *Impatiens* (Balsaminaceae). *American journal of botany*, 96(11), 1990-1996.  
698  
699 Murphy, G. P., Swanton, C. J., Van Acker, R. C., & Dudley, S. A. (2017). Kin recognition,  
700 multilevel selection and altruism in crop sustainability. *Journal of Ecology (Oxford)*, 105(4),  
701 930-934.  
702  
703 Okasha, S. (2020). Altruism, group selection and correlated interaction. *The British journal*  
704 *for the philosophy of science*.  
705  
706 Patterson, N., Price, A. L., & Reich, D. (2006). Population structure and eigenanalysis. *PLoS*  
707 *genetics*, 2(12), e190.

708

709 Pégard, M., Rogier, O., Bérard, A., Faivre-Rampant, P., Paslier, M. C. L., Bastien, C., et al.  
710 (2019). Sequence imputation from low density single nucleotide polymorphism panel in a  
711 black poplar breeding population. *BMC genomics*, *20*(1), 1-16.

712

713 Pégard, M., Segura, V., Muñoz, F., Bastien, C., Jorge, V., & Sanchez, L. (2020). Favorable  
714 conditions for genomic evaluation to outperform classical pedigree evaluation highlighted by  
715 a proof-of-concept study in poplar. *Frontiers in plant science*, *11*, 581954.

716

717 Powell, J. E., Visscher, P. M., & Goddard, M. E. (2010). Reconciling the analysis of IBD and  
718 IBS in complex trait studies. *Nature Reviews Genetics*, *11*(11), 800-805.

719

720 R Core Team (2022). R: A language and environment for statistical computing. R  
721 Foundation for Statistical Computing, Vienna, Austria. URL. <https://www.R-project.org/>

722

723 Ratcliffe, B., El-Dien, O. G., Cappa, E. P., Porth, I., Klápště, J., Chen, C., & El-Kassaby, Y.  
724 A. (2017). Single-step BLUP with varying genotyping effort in open-pollinated *Picea glauca*.  
725 *G3: Genes, Genomes, Genetics*, *7*(3), 935-942.

726

727 Resende, M. D., Resende Jr, M. F., Sansaloni, C. P., Petrolí, C. D., Missiaggia, A. A.,  
728 Aguiar, A. M., et al. (2012). Genomic selection for growth and wood quality in Eucalyptus:  
729 capturing the missing heritability and accelerating breeding for complex traits in forest trees.  
730 *New Phytologist*, *194*(1), 116-128.

731

732 Rosenberg, N. A., Li, L. M., Ward, R., & Pritchard, J. K. (2003). Informativeness of genetic  
733 markers for inference of ancestry. *The American Journal of Human Genetics*, *73*(6), 1402-  
734 1422.

735

- 736 Sanchez, M. P., Govignon-Gion, A., Croiseau, P., Fritz, S., Hozé, C., Miranda, G., et al.  
737 (2017). Within-breed and multi-breed GWAS on imputed whole-genome sequence variants  
738 reveal candidate mutations affecting milk protein composition in dairy cattle. *Genetics*  
739 *Selection Evolution*, 49(1), 1-16.
- 740
- 741 Silvertown, J. (2004). Plant coexistence and the niche. *Trends in Ecology & evolution*,  
742 19(11), 605-611.
- 743
- 744 Smithson, J. B., & Lenne, J. M. (1996). Varietal mixtures: a viable strategy for sustainable  
745 productivity in subsistence agriculture. *Annals of applied biology*, 128(1), 127-158.
- 746
- 747 Stephens, M. (2017). False discovery rates: a new deal. *Biostatistics*, 18(2), 275-294.
- 748
- 749 Thistlethwaite, F. R., Gamal El-Dien, O., Ratcliffe, B., Klápště, J., Porth, I., Chen, C., et al.  
750 (2020). Linkage disequilibrium vs. pedigree: Genomic selection prediction accuracy in  
751 conifer species. *PLoS One*, 15(6), e0232201.
- 752
- 753 Tiret, M., & Milesi, P. Statistical Peak Detection for GWAS. Zenodo.  
754 <https://doi.org/10.5281/zenodo.5079556>. Deposited 7 July 2021.
- 755
- 756 Tsai, H. Y., Matika, O., Edwards, S. M., Antolín-Sánchez, R., Hamilton, A., Guy, D. R., et al.  
757 (2017). Genotype imputation to improve the cost-efficiency of genomic selection in farmed  
758 Atlantic salmon. *G3: Genes, genomes, genetics*, 7(4), 1377-1383.
- 759
- 760 VanRaden, P. M. (2008). Efficient methods to compute genomic predictions. *Journal of dairy*  
761 *science*, 91(11), 4414-4423.
- 762

763 Weiner, J., Andersen, S. B., Wille, W. K. M., Griepentrog, H. W., & Olsen, J. M. (2010).  
764 Evolutionary Agroecology: the potential for cooperative, high density, weed-suppressing  
765 cereals. *Evolutionary Applications*, 3(5-6), 473-479.  
766  
767 Weiner, J., Du, Y. L., Zhang, C., Qin, X. L., & Li, F. M. (2017). Evolutionary agroecology:  
768 individual fitness and population yield in wheat (*Triticum aestivum*).  
769  
770 Weiner, J. (2019). Looking in the wrong direction for higher-yielding crop genotypes. *Trends*  
771 *in Plant Science*, 24(10), 927-933.  
772  
773 Wilson, D. S., & Wilson, E. O. (2007). Rethinking the theoretical foundation of sociobiology.  
774 *The Quarterly review of biology*, 82(4), 327-348.  
775  
776 Yang, J., Benyamin, B., McEvoy, B. P., Gordon, S., Henders, A. K., Nyholt, D. R., et al.  
777 (2010). Common SNPs explain a large proportion of the heritability for human height. *Nature*  
778 *genetics*, 42(7), 565-569.  
779  
780 Zeileis, A., & Hothorn, T. (2002). Diagnostic Checking in Regression Relationships. *R News*  
781 2(3), 7-10.  
782  
783 Zhang, Z., Liu, J., Ding, X., Bijma, P., de Koning, D. J., & Zhang, Q. (2010). Best linear  
784 unbiased prediction of genomic breeding values using a trait-specific marker-derived  
785 relationship matrix. *PLoS one*, 5(9), e12648.  
786  
787



## 788 Figures

789 **Figure 1.** GWAS on tree height and rust vulnerability in *Populus nigra*. **(A)**. Manhattan plot of  
790 the GWAS on tree height. The dots are the log significance of the markers. The solid  
791 horizontal line stands for the 5% significance level, and the dashed horizontal line stands for  
792 the 5% FDR level. The vertical dashed lines are position where significant hits were detected  
793 as being part of a peak. **(B)**. Idem as panel A, for rust vulnerability. **(C)**. Q-Q plot of the  
794 GWAS on tree height. The dots were the quantile of the markers; the solid line is the 1-slope  
795 segment; the gray cross is the position of the median; and the gray area is the 95%  
796 confidence interval. **(D)**. Idem as panel C, for rust vulnerability.

797

798 **Figure 2.** The first two axes of the Multidimensional Scaling (MDS) of *Populus nigra*. **(A)**.  
799 MDS with labels of the fathers (with black large shapes). Colored and smaller shapes are the  
800 offspring, the shape corresponding to its father. **(B)**. The same MDS as in panel A., but  
801 labeled for the mothers.

802

803 **Figure 3.** Within family variance ( $V_F$ ) for each subset of SNPs. The black dashed horizontal  
804 line is the average  $V_F$  of randomly sampled SNPs, the gray dashed horizontal lines delimit  
805 the 95% confidence interval, and the black horizontal dotted line is  $V_F$  of the entire set of  
806 SNPs. Red dots are when selected for tree height, and blue for rust vulnerability. SNP  
807 subsets: largest or smallest MAF (+ or - MAF), largest or smallest AIM (+ or - AIM), most or  
808 least significant (+ or -  $\log_{10}(p)$ ), and most or least heritable for tree height (+ or -  $h^2$ ).

809

810

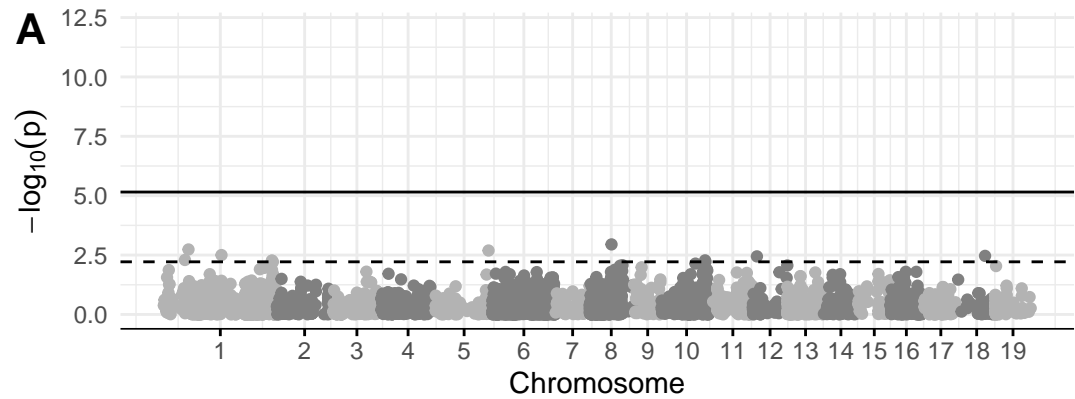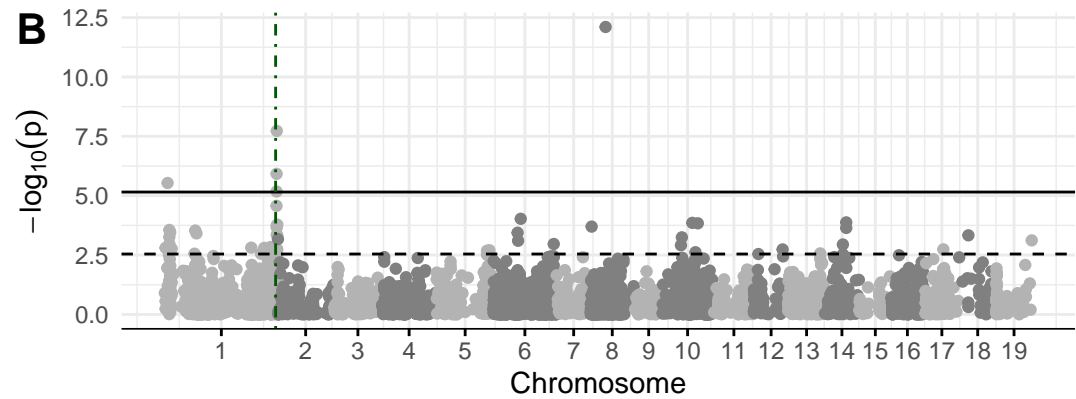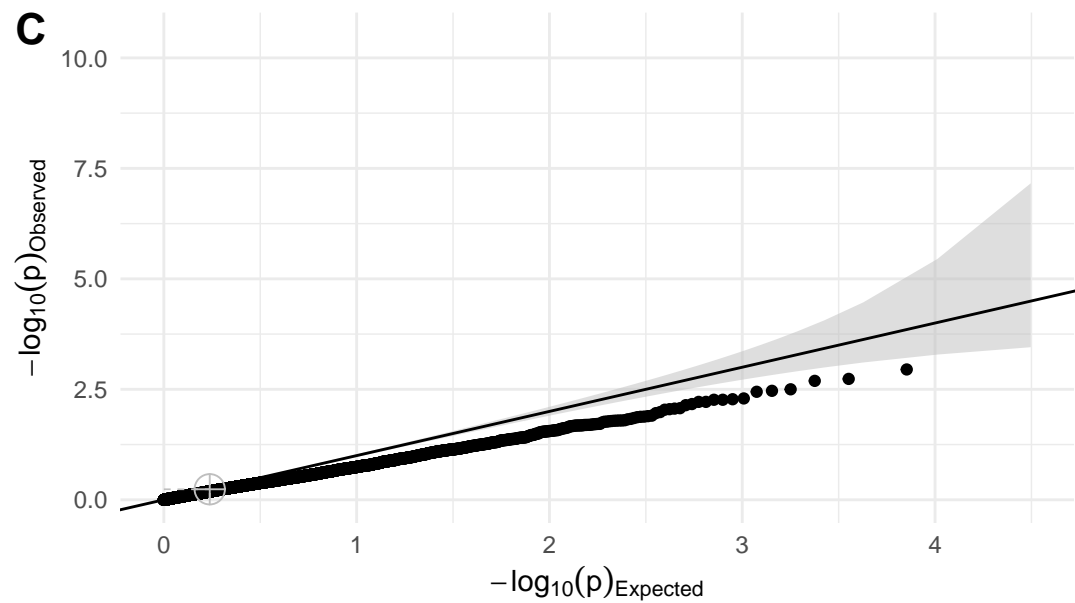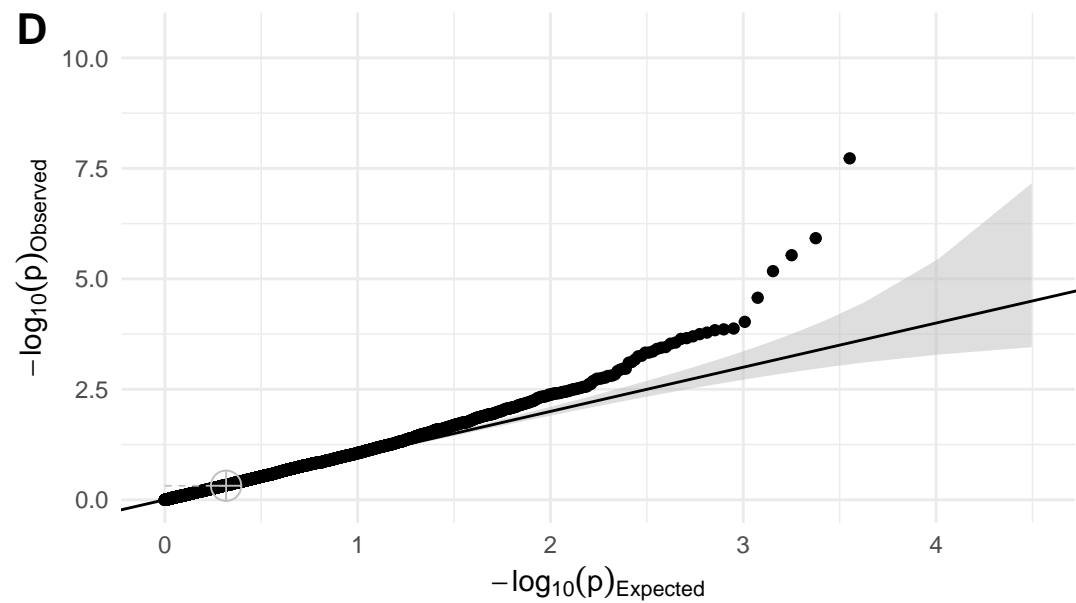

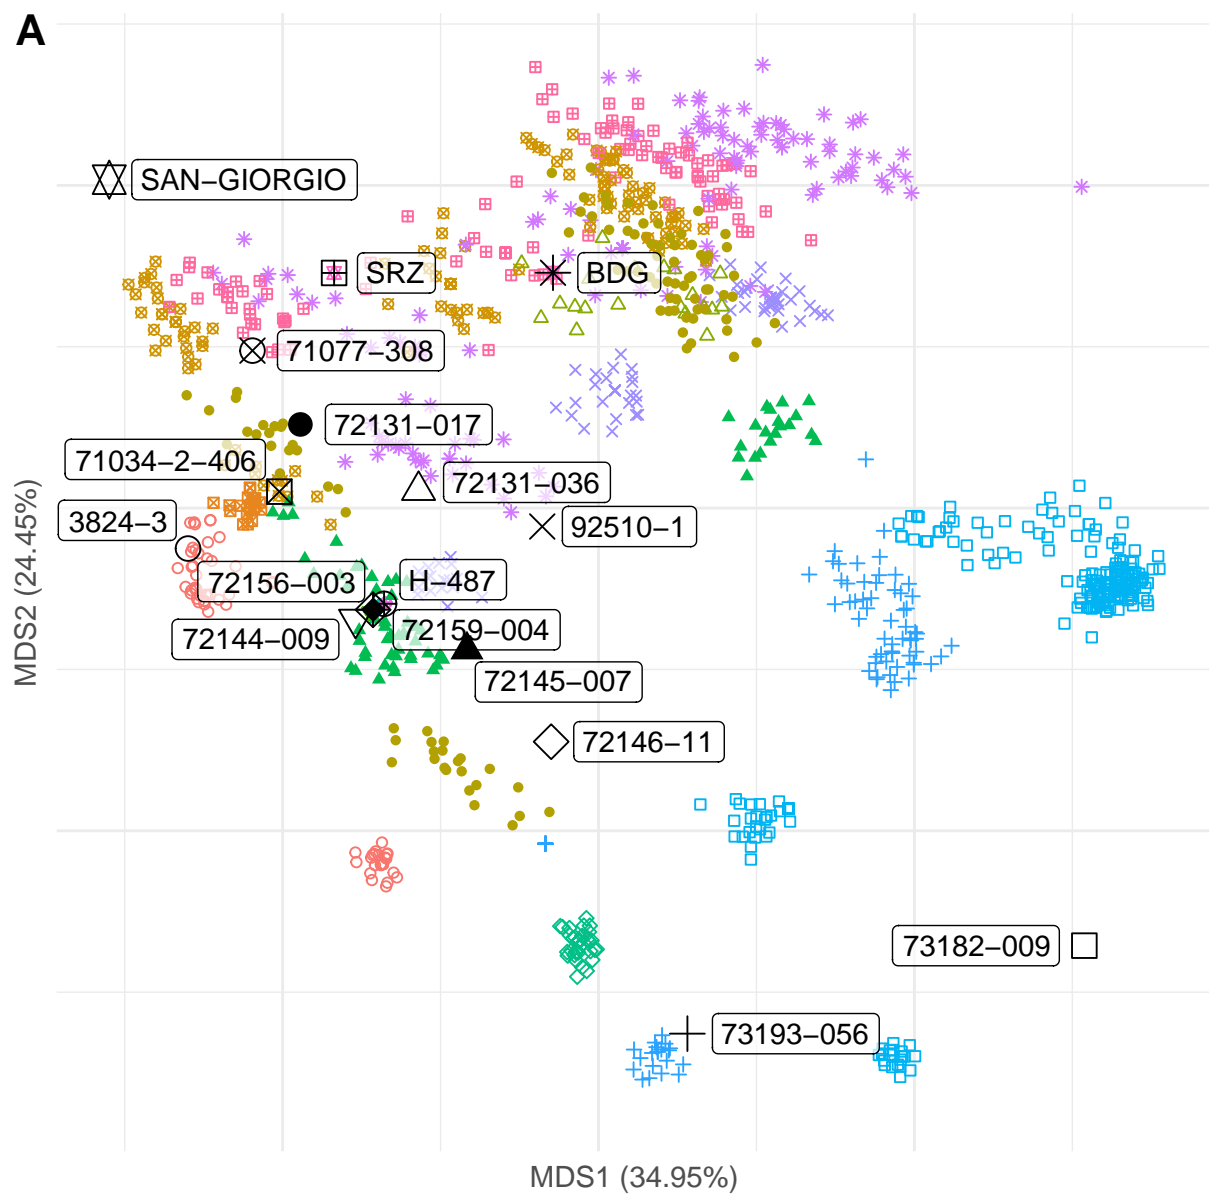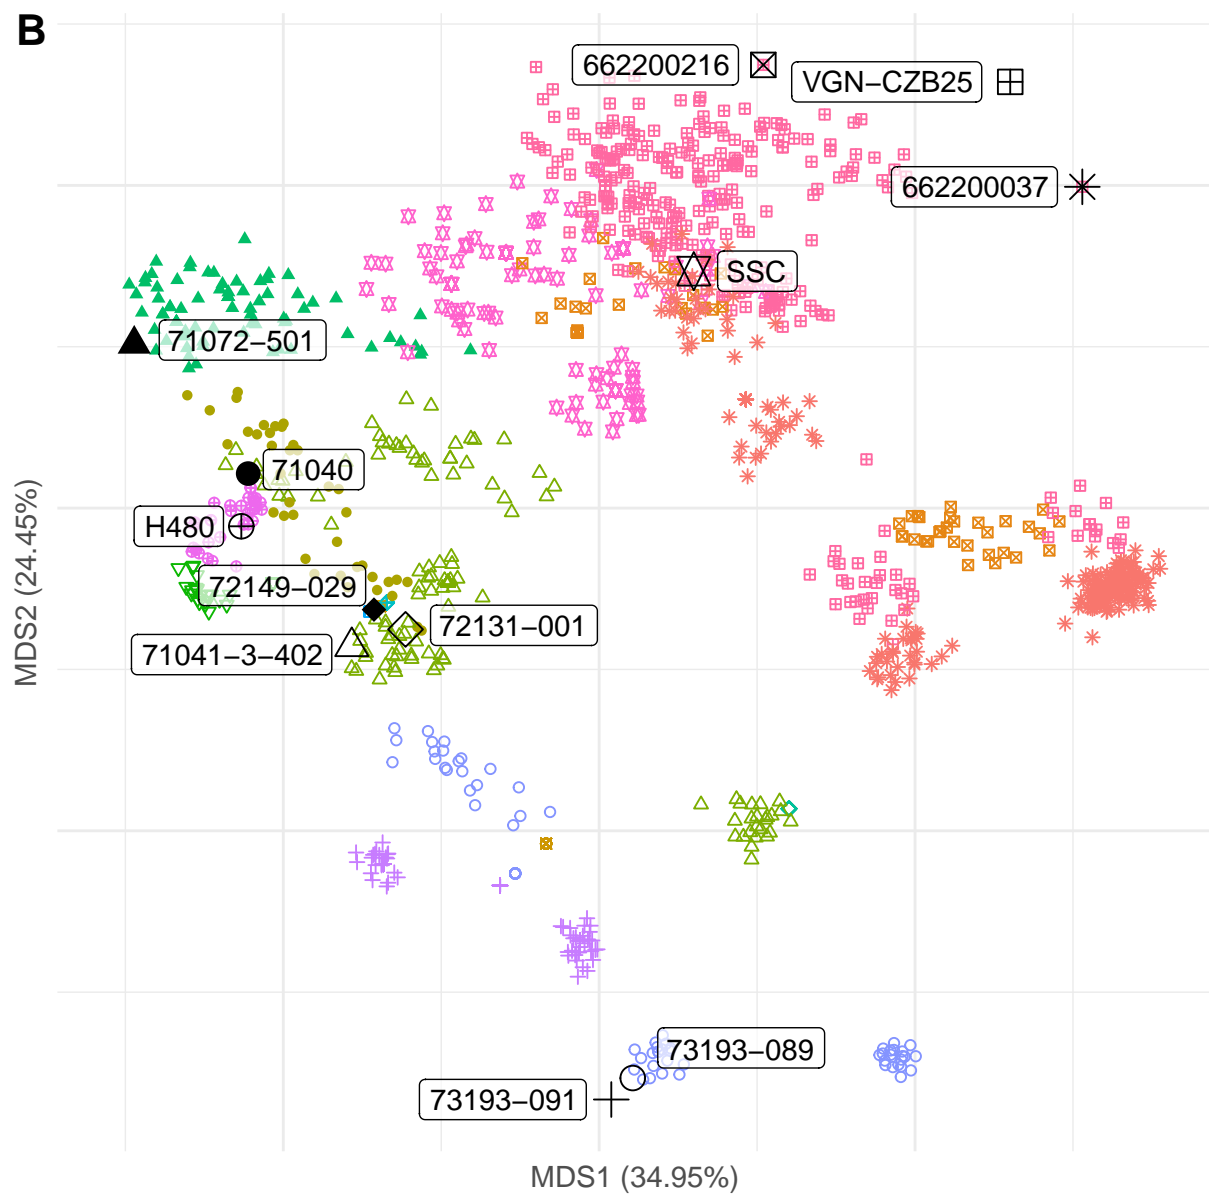

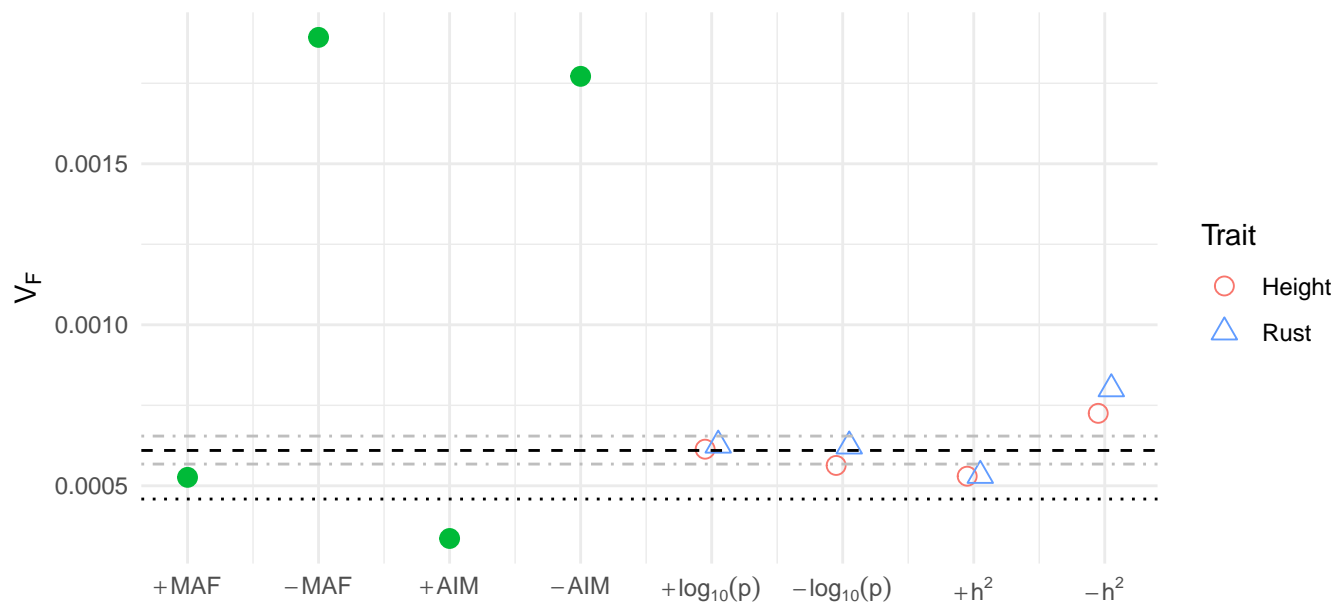

Source: https://www.biorxiv.org/content/biorxiv/early/2024/02/28/2023.06.21.545987.full.pdf
